# Supplementary material for: Unique activity of a Keggin POM for efficient heterogeneous electrocatalytic OER
Source: PubMed Central journal article supplement — iScience. 2024 Mar 22;27(4):109551. doi: 10.1016/j.isci.2024.109551 (PMC11001645; doi:10.1016/j.isci.2024.109551), 2024-03-22
Supplement: mmc1.pdf [file mmc1.pdf]

iScience, Volume 27

## **Supplemental information**

**Unique activity of a Keggin POM**

**for efficient heterogeneous electrocatalytic OER**

**Chandani Singh, Dan Meyerstein, Zorik Shamish, Dror Shamir, and Ariela Burg**

## Section 1. Characterization of sol-gel electrodes and Co-POM

### 1.1 Electrode structure

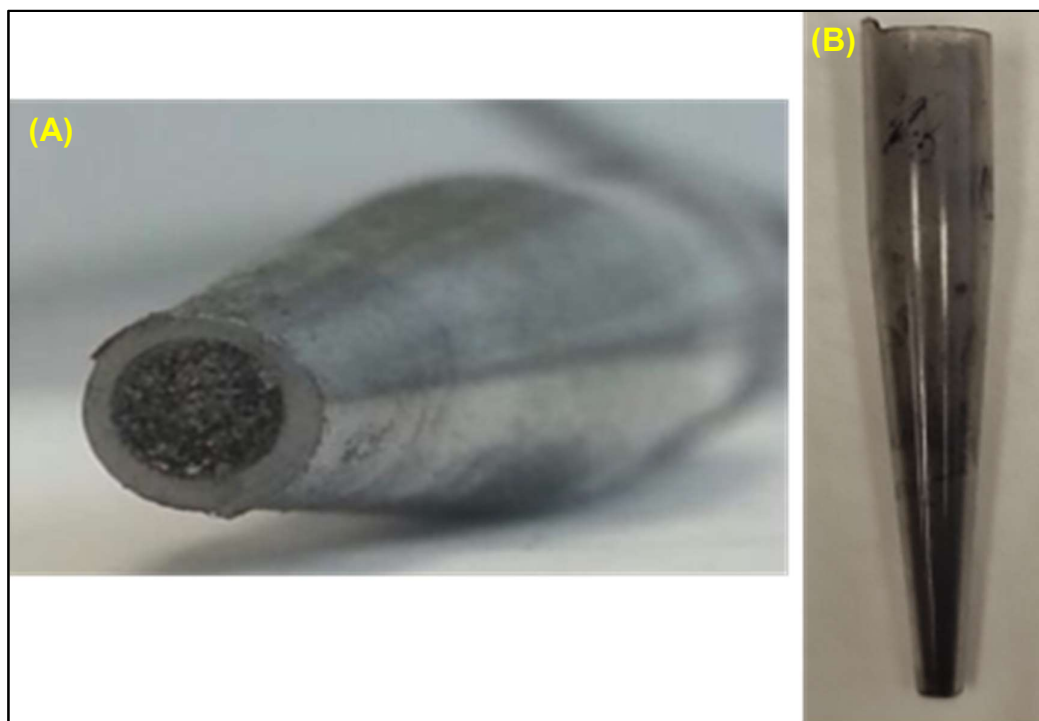

**Fig. S1.** Sol-Gel electrode entrapped Keggin POM.

(A) Front view of the prepared sol-gel electrode. (B) Side-view of the prepared sol-gel electrode.

### 1.1 Powder-XRD (PXRD) pattern of Co-POM

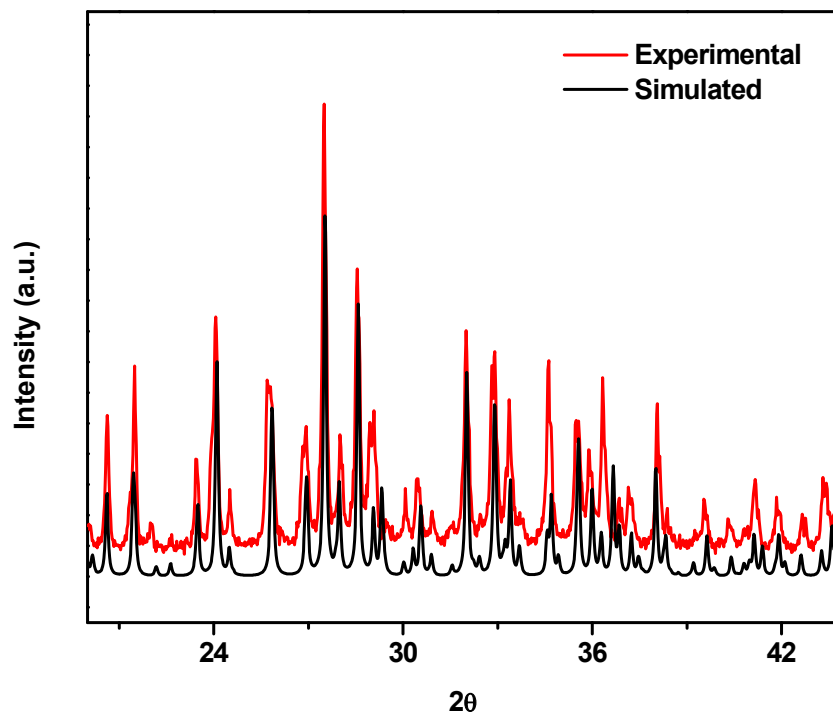

**Fig. S2.** PXRD pattern of Co-POM compared with its simulated pattern.

## 1.2. FTIR Analysis

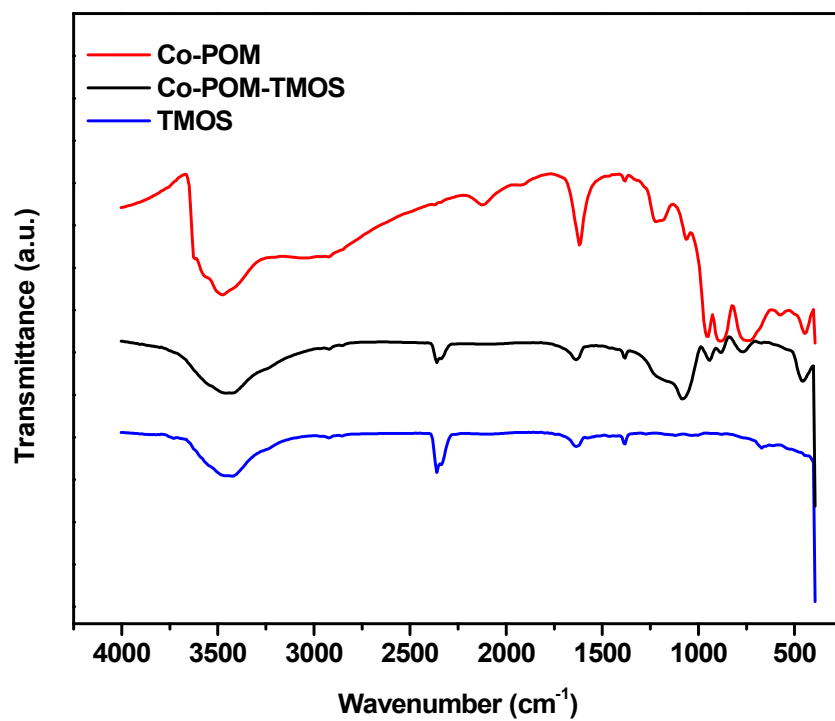

**Fig. S3.** FTIR pattern of Co-POM-TMOS and TMOS sol gel compared with Co-POM.

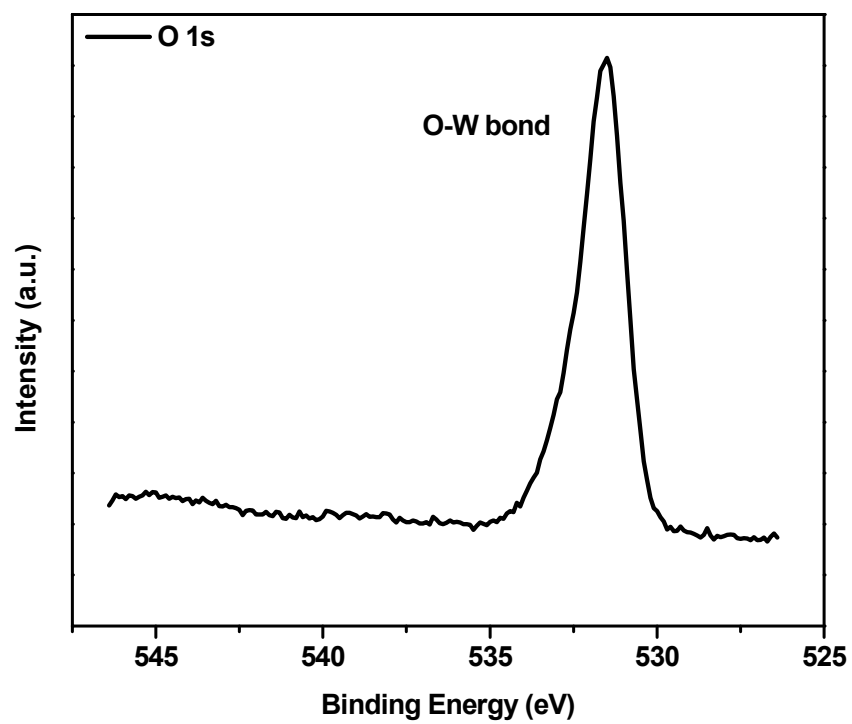

**Fig. S4.** XPS spectrum of Oxygen in Co-POM.

### 1.3. Raman analysis

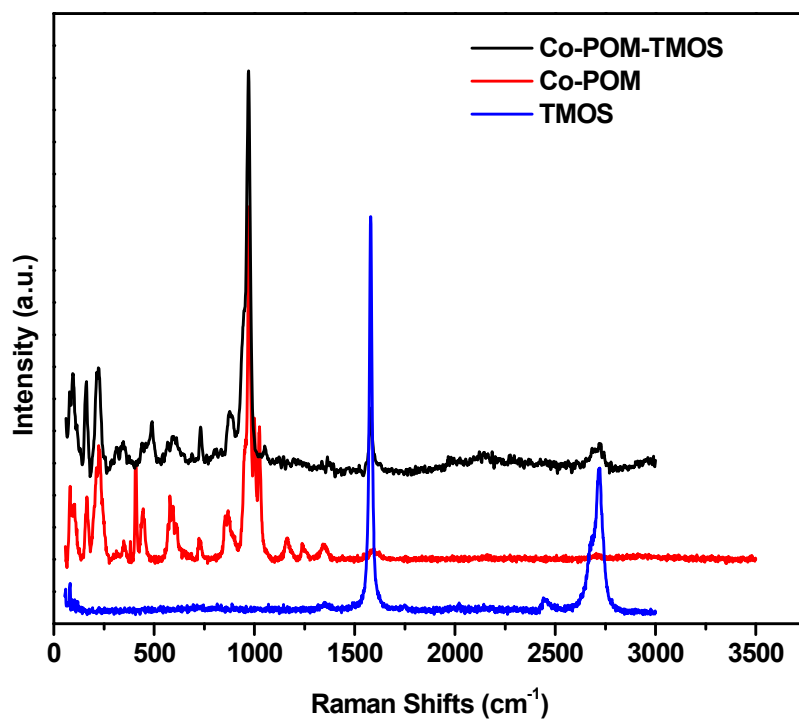

**Fig. S5.** Raman spectral analysis of Co-POM-TMOS and TMOS sol gel compared with Co-POM. The major peaks in Co-POM are dominated by the terminal W–O stretch at approximately 970 cm<sup>-1</sup>, Other W–O stretch and bend modes could be spotted at 870 cm<sup>-1</sup> and 225 cm<sup>-1</sup>, respectively [1].

## Section 2. Electrochemical Studies of Co-POM-TMOS sol-gel electrodes

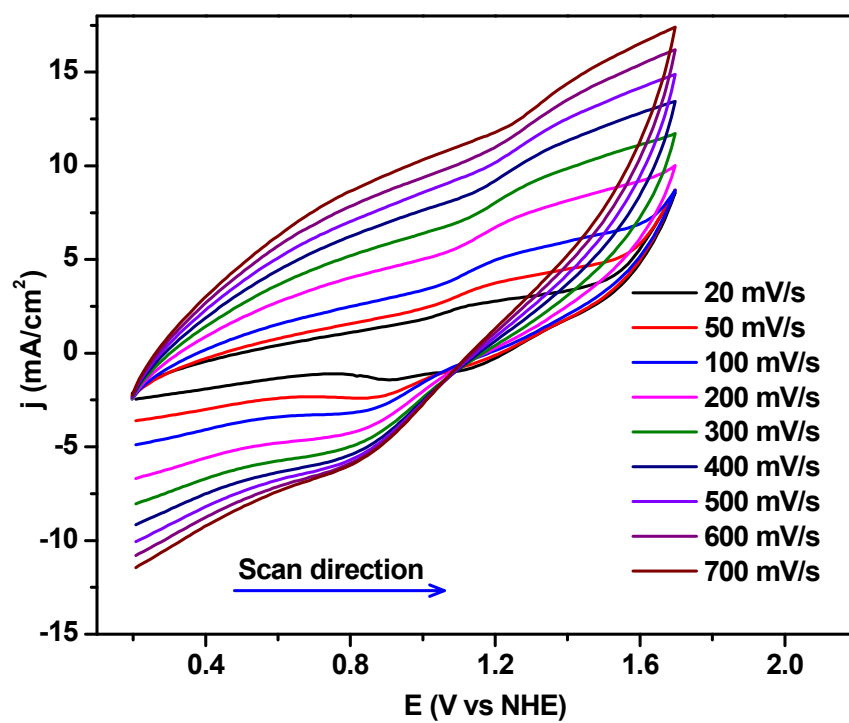

**Fig. S6.** Cyclic Voltammograms (CVs) recorded for Co-POM-TMOS sol-gel electrode at various scan rates; recorded at 0.2 M  $\text{NaClO}_4$  pH 2.

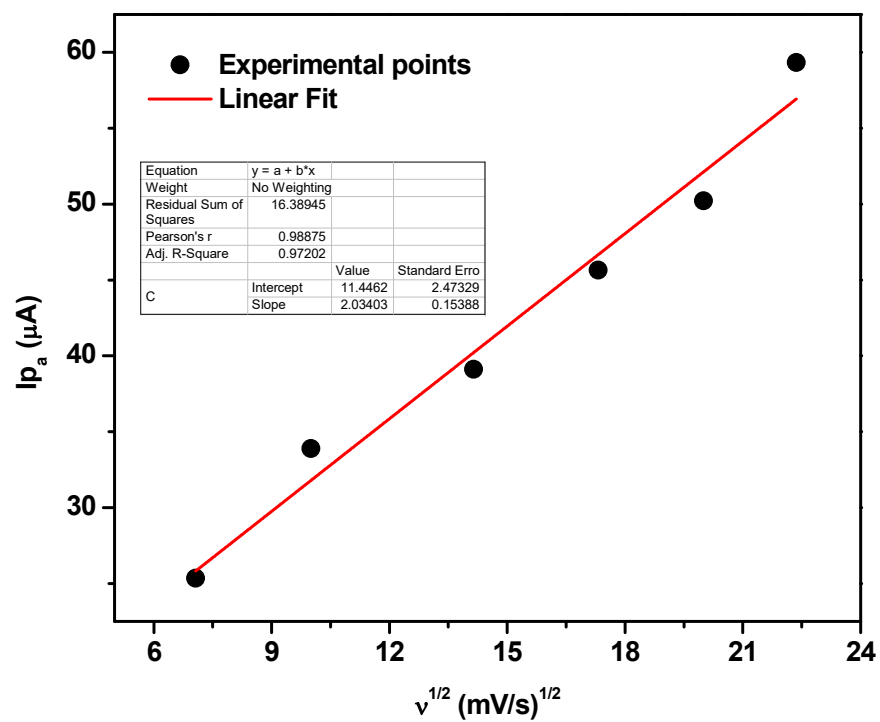

**Fig. S7.** A plot of anodic peak current ( $I_{p_a}$ ) vs. square root of scan rate for Co-POM-TMOS sol-gel electrode.



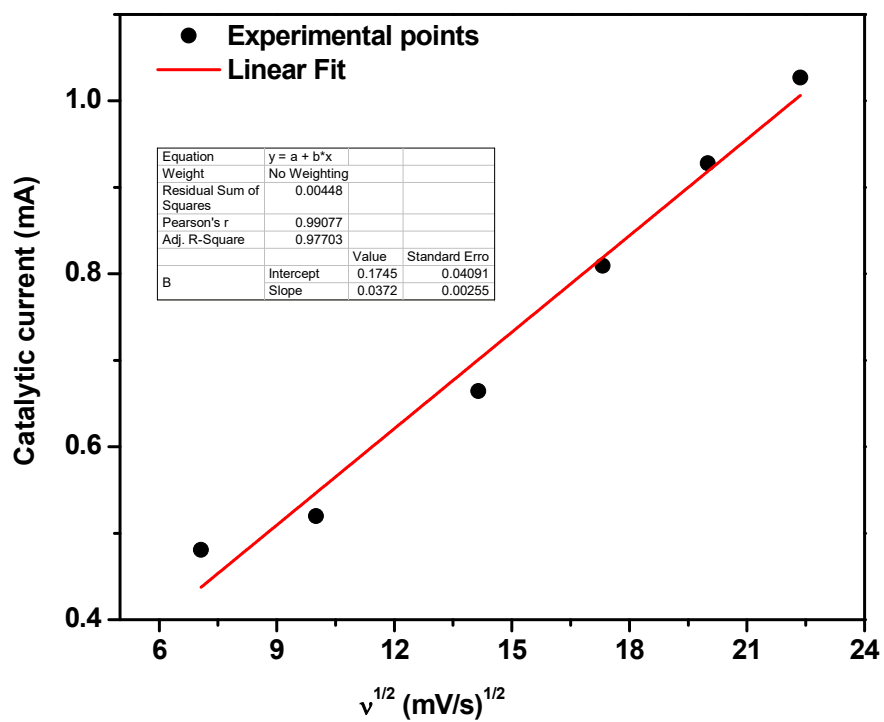

**Fig. S8.** A plot of cathodic peak current ( $I_{pc}$ ) vs. square root of scan rate for Co-POM-TMOS sol-gel electrode.

### Section 3. TOF calculation

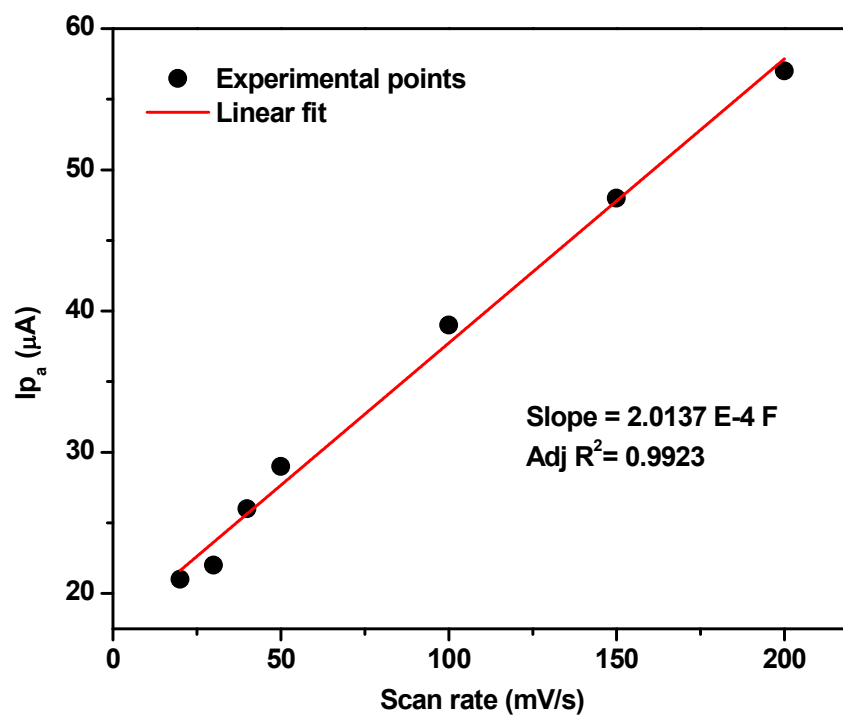

**Fig. S9.** A plot of anodic peak current ( $I_{p_a}$ ) vs. scan rate for Co-POM-TMOS sol-gel electrode.

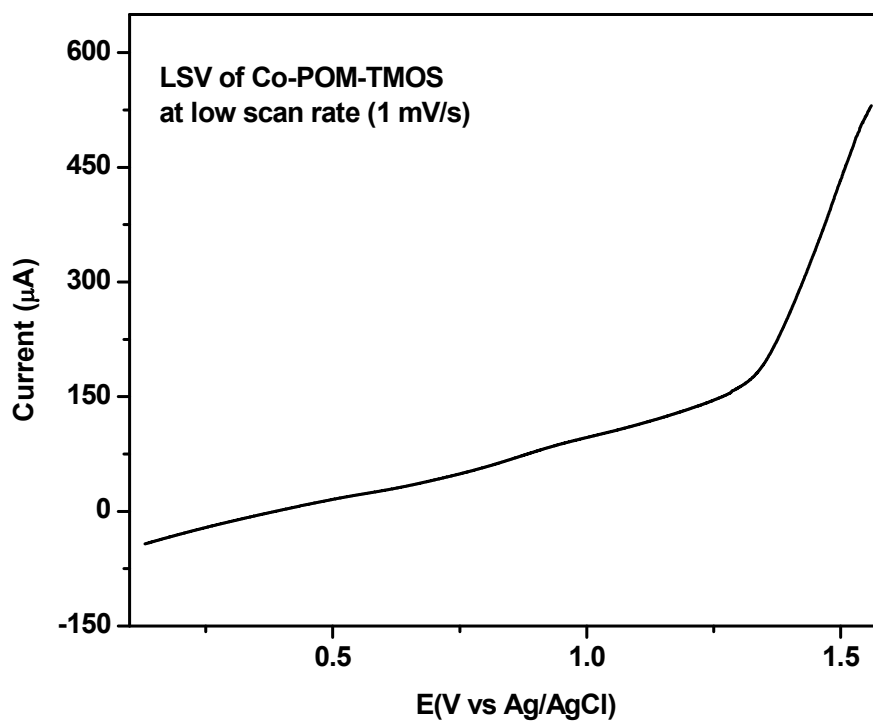

**Fig. S10.** Linear scan voltammogram (LSV) of Co-POM-TMOS sol-gel electrode recorded at extremely low scan rate (1 mV/s); recorded at 0.2 M NaClO<sub>4</sub> pH 2.

**Section 4. Calculating Electrochemical Surface area (ECSA) for the sol-gel electrodes:**

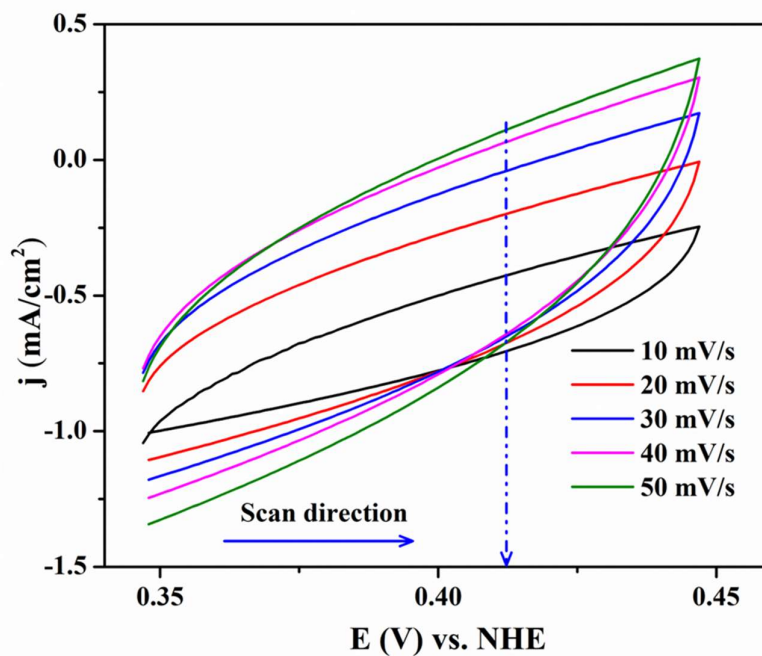

**Fig. S11.** Cyclic Voltammograms (CVs) recorded for Co-POM-TMOS sol-gel electrode at various scan rates in the non-faradic region (0.35-0.45 V); recorded in 0.2 M NaClO<sub>4</sub>, pH 2.

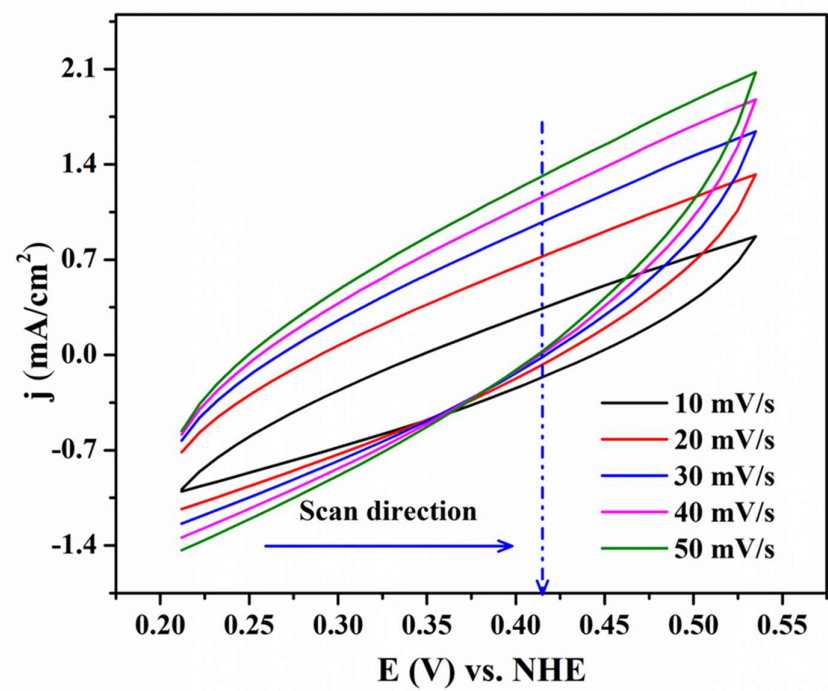

**Fig. S12.** Cyclic Voltammograms (CVs) recorded for TMOS sol-gel electrode at various scan rates in the non-faradic region (0.35-0.45 V); recorded in 0.2 M NaClO<sub>4</sub>, pH 2.

## Section 5. Characterization of the electrodes post-electrochemical study

**Table S1.** EDS Analysis of TMOS sol-gel electrode, Co-POM-TMOS sol-gel electrodes before and after the electrochemical study\*.

| Sample ID                                                      | C (%) | Si (%) | O (%) | W (%) |
|----------------------------------------------------------------|-------|--------|-------|-------|
| TMOS sol-gel electrode                                         | 89.9  | 0.9    | 8.1   | --    |
| Co-POM-TMOS sol-gel electrodes after Electrochemical test      | 86.8  | 1.4    | 8.6   | 0.4   |
| Co-POM-TMOS sol-gel electrodes before the Electrochemical test | 89.7  | 1.7    | 8.2   | 0.3   |

\* The instrument error equals to  $\pm 2\%$ .

**Table S2.** ICP analysis of 0.2 M of NaClO<sub>4</sub> after CPE measurement for Co-POM-TMOS sol-gel electrode.

| W (mg/L) | Co (mg/L) | Si(mg/L) |
|----------|-----------|----------|
| 0.4      | 0.1       | 1.3      |

**Table S3.** Electrodes composition, which were prepared in this study.

| Code                | Graphite (g) | TMOS ( $\mu\text{L}$ ) | Co-POM (g) | WATER ( $\mu\text{L}$ ) | pH |
|---------------------|--------------|------------------------|------------|-------------------------|----|
| TMOS                | 0.15         | 300                    | 0          | 600                     | 2  |
| Co-POM-TMOS         | 0.15         | 300                    | 3.2        | 600                     | 2  |
| control Co-POM-TMOS | 0            | 300                    | 3.2        | 600                     | 2  |



## Section 6. Electrochemical Impedance Spectroscopy

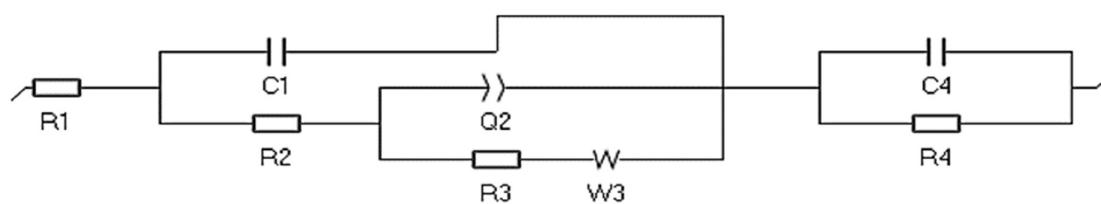

**Fig. S13.** Equivalent circuit for fitting experimental data of Nyquist plot in figure 5.

**Table S4.** Parameters of different components of both electrodes as obtained by fitting the Nyquist plot

| TMOS -electrode                      | Co-POM-TMOS electrode                |
|--------------------------------------|--------------------------------------|
| R1 = 354,8 Ohm                       | R1 = 46,23 Ohm                       |
| C1 = 0,153 9e-6 F                    | C1 = 0,244 4e-6 F                    |
| R2 = 56,97 Ohm                       | R2 = 6,385 Ohm                       |
| Q2 = 1,777e-3 F.s <sup>(a - 1)</sup> | Q2 = 0,106e-3 F.s <sup>(a - 1)</sup> |
| a3 = 0,272 6                         | a2 = 0,66                            |
| R3 = 60,13e15 Ohm                    | R3 = 12,14 Ohm                       |
| C4 = 18,6e-9 F                       | s3 = 278,4 Ohm.s <sup>-1/2</sup>     |
| R4 = 74,17 Ohm                       | C4 = 3,079e-3 F                      |
|                                      | R4 = 104,5 Ohm                       |

**References:**

- [1] M. Yaqub, J.J. Walsh, T.E. Keyes, A. Proust, C. Rinfray, G. Izzet, T. McCormac, R.J. Forster (2014). Electron Transfer to Covalently Immobilized Keggin Polyoxotungstates on Gold. *Langmuir*, 30, 4509-4516.
